# Supplementary material for: Association test using Copy Number Profile Curves (CONCUR) enhances power in rare copy number variant analysis
Source: PLOS journal article supplement (doi:10.1371/journal.pcbi.1007797), 2020-05-04
Supplement: S4 (10.1371/journal.pcbi.1007797.s004) [file journal.pcbi.1007797.s004]

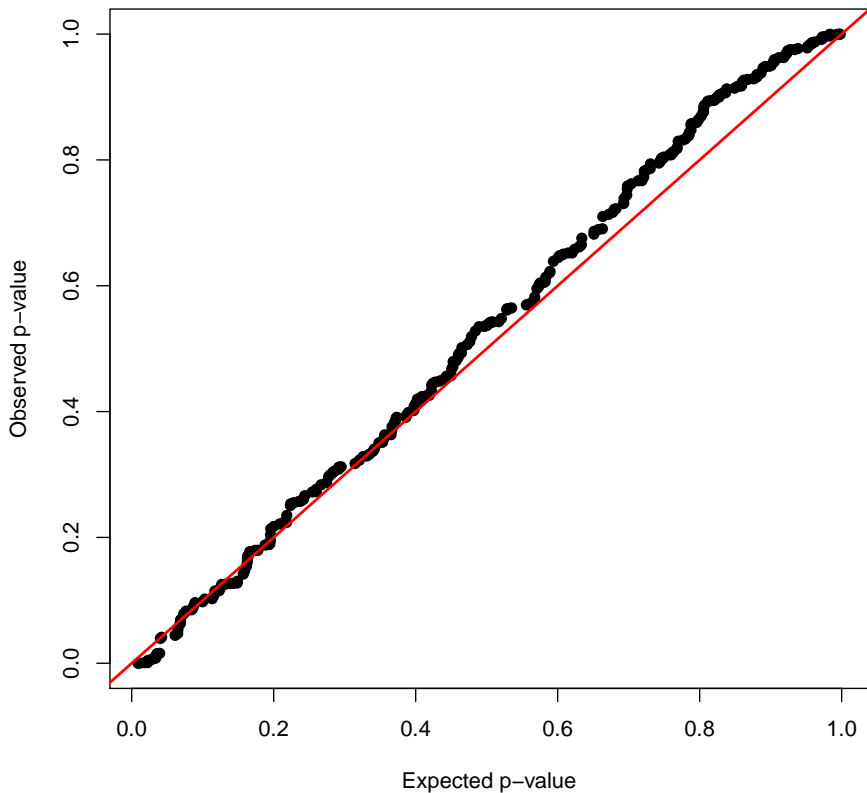

**S4 Fig (a).** QQ-plot for CONCUR p-values in TWB lipid metabolism pathways negative control analysis. P-values from pathway analyses with permuted TG levels, with 20 replications per pathway (20\*15 p-values). Expected p-values come from a Uniform(0,1) distribution.

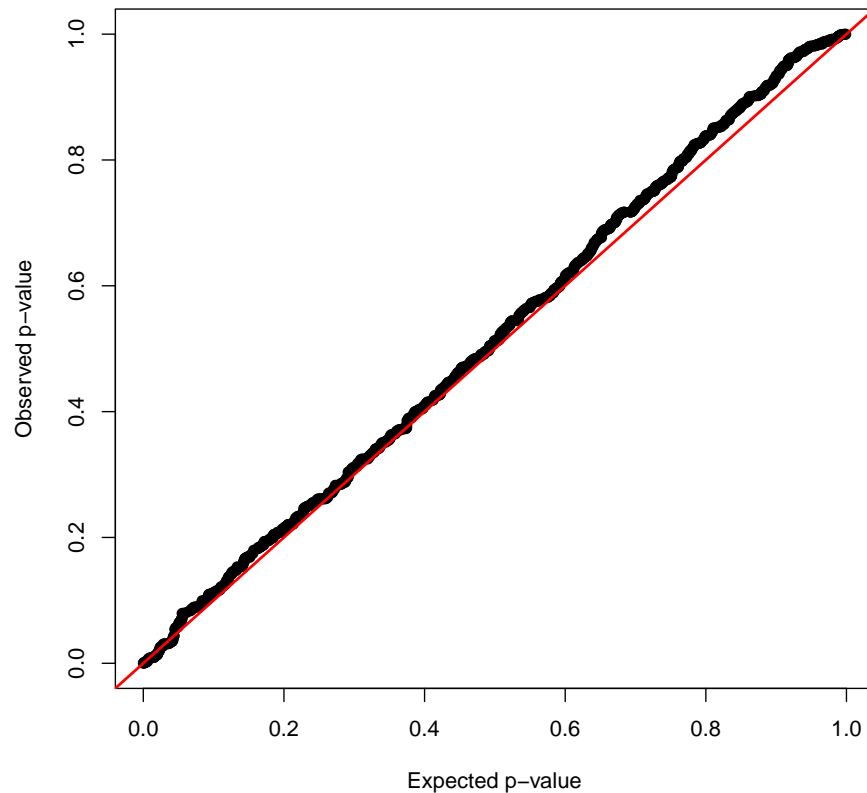

**S4 Fig (b).** QQ-plot for CONCUR p-values in TWB chromosome 13 negative control analysis. P-values from 1000 replications of the chromosome 13 analysis with permuted TG levels. Expected p-values come from a Uniform(0,1) distribution.
